# Supplementary material for: The yellow specialist: droneflyEristalis tenaxprefers different yellow colours for landing and proboscis extension
Source: Oxford University Press journal article supplement (doi:10.1242/jeb.184788), 2018-01-01
Supplement: jeb184788supp.pdf [file jeb184788supp.pdf]

Table S1. Quantum catch of all photoreceptors given for all tested colour stimuli and the respective background and illumination (Daylight: D65; fluorescent tubes: Fl. tubes). Name of experiment, figure with the respective results and experimental light conditions and background are given. Moreover the corresponding wavelength (Corresp.  $\lambda$ ) and the spectral purity (Spectral purity) of the colour stimuli are given. Colour stimuli which were tested simultaneously are shaded similarly. The last column (Prefer.) presents frequency of choices or indicate strong (+), middle (~) or no (-) preference for the trained colour or the spontaneously chosen colour.

|                                                                               | Colour            | R7p    | R7y    | R8p    | R8y   | R1-6   | Corresp. $\lambda$ | Spectral purity | Prefer. |
|-------------------------------------------------------------------------------|-------------------|--------|--------|--------|-------|--------|--------------------|-----------------|---------|
| <b>Mutiple-choice experiment</b><br><b>Fig. 2</b><br>D65; AV400               | Bright blue UV+   | 3.372  | 4.341  | 5.064  | 2.263 | 4.584  | 430                | 0.101           | 0       |
|                                                                               | Bright blue UV-   | 1.480  | 3.701  | 4.929  | 2.278 | 4.326  | 484                | 0.175           | 13      |
|                                                                               | Bright red UV+    | 4.809  | 3.054  | 2.455  | 1.571 | 2.510  | 389                | 0.130           | 1       |
|                                                                               | Bright red UV-    | 1.099  | 1.916  | 2.352  | 1.610 | 2.185  | 490                | 0.156           | 3       |
|                                                                               | Bright yellow UV+ | 5.644  | 4.125  | 3.297  | 5.434 | 3.720  | 573                | 0.062           | 14      |
|                                                                               | Bright yellow UV- | 1.080  | 2.385  | 2.640  | 5.100 | 2.862  | 515                | 0.200           | 10      |
|                                                                               | Bright green UV+  | 3.246  | 3.031  | 2.851  | 3.277 | 2.979  | 569                | 0.020           | 1       |
|                                                                               | Bright green UV-  | 1.055  | 2.335  | 2.748  | 3.348 | 2.753  | 508                | 0.200           | 3       |
|                                                                               | Bright pink UV+   | 9.685  | 6.974  | 6.229  | 3.160 | 6.097  | 407                | 0.089           | 0       |
|                                                                               | Bright pink UV-   | 2.146  | 4.696  | 6.145  | 3.360 | 5.493  | 488                | 0.124           | 7       |
|                                                                               | White UV+         | 16.350 | 12.621 | 11.493 | 7.679 | 11.388 | 400                | 0.029           | 0       |
|                                                                               | White UV-         | 2.782  | 7.212  | 9.369  | 6.818 | 8.580  | 497                | 0.112           | 6       |
|                                                                               | Dark blue UV+     | 2.779  | 3.538  | 4.121  | 1.789 | 3.722  | 429                | 0.124           | 0       |
|                                                                               | Dark blue UV-     | 1.284  | 3.005  | 3.970  | 1.783 | 3.484  | 480                | 0.184           | 3       |
|                                                                               | Dark red UV+      | 2.948  | 1.787  | 1.380  | 0.926 | 1.438  | 376                | 0.178           | 0       |
|                                                                               | Dark red UV-      | 0.794  | 1.049  | 1.193  | 0.876 | 1.143  | 480                | 0.109           | 0       |
|                                                                               | Dark yellow UV+   | 2.653  | 1.995  | 1.494  | 4.128 | 1.876  | 558                | 0.138           | 24      |
|                                                                               | Dark yellow UV-   | 0.874  | 1.552  | 1.542  | 4.378 | 1.844  | 531                | 0.200           | 13      |
|                                                                               | Dark green UV+    | 2.214  | 1.958  | 1.790  | 2.079 | 1.892  | 582                | 0.042           | 1       |
|                                                                               | Dark green UV-    | 0.820  | 1.428  | 1.605  | 1.955 | 1.631  | 512                | 0.180           | 2       |
| Dark pink UV+                                                                 | 4.559             | 3.056  | 2.673  | 0.975  | 2.596 | 410    | 0.263              | 0               |         |
| Dark pink UV-                                                                 | 1.220             | 1.862  | 2.349  | 0.921  | 2.086 | 440    | 0.193              | 3               |         |
| Grey UV+                                                                      | 11.676            | 9.504  | 8.922  | 5.987  | 8.778 | 404    | 0.034              | 1               |         |
| Grey UV-                                                                      | 2.370             | 5.997  | 7.762  | 5.623  | 7.115 | 497    | 0.125              | 3               |         |
| <b>Colour learning and discrimination</b><br><b>Fig. 3</b><br>Grey; Fl. tubes | Bright yellow     | 1.578  | 1.876  | 1.948  | 2.509 | 1.965  | 526                | 0.063           | +       |
|                                                                               | Bright blue       | 1.200  | 2.283  | 2.669  | 1.669 | 2.500  | 480                | 0.155           | +       |
|                                                                               | Bright yellow     | 1.321  | 1.492  | 1.512  | 2.153 | 1.554  | 536                | 0.080           | ~       |
|                                                                               | Fluorescent white | 1.546  | 3.512  | 4.273  | 2.180 | 3.911  | 477                | 0.158           | +       |
|                                                                               | Mustard yellow    | 0.160  | 0.110  | 0.072  | 0.500 | 0.112  | 563                | 0.639           | +       |
|                                                                               | Red orange        | 0.670  | 0.637  | 0.631  | 0.713 | 0.639  | 559                | 0.039           | +       |
|                                                                               | Green             | 0.316  | 0.385  | 0.335  | 1.310 | 0.420  | 546                | 0.408           | ~       |
|                                                                               | Orange            | 0.373  | 0.303  | 0.254  | 0.724 | 0.301  | 558                | 0.334           | ~       |
|                                                                               | Pink              | 0.781  | 0.780  | 0.852  | 0.260 | 0.790  | 426                | 0.474           | ~       |

|                                                                               |                           |       |       |       |       |       |       |       |       |
|-------------------------------------------------------------------------------|---------------------------|-------|-------|-------|-------|-------|-------|-------|-------|
| <b>Colour learning and discrimination</b><br><b>Fig. 3</b><br>Grey; Fl. tubes | Violet                    | 0.716 | 0.881 | 1.010 | 0.287 | 0.923 | 430   | 0.470 | ~     |
|                                                                               | Dark yellow               | 1.172 | 1.385 | 1.430 | 1.823 | 1.448 | 526   | 0.073 | -     |
|                                                                               | Bright yellow             | 1.163 | 1.300 | 1.295 | 2.102 | 1.354 | 541   | 0.108 | +     |
|                                                                               | Bright yellow             | 1.177 | 1.303 | 1.296 | 2.063 | 1.353 | 541   | 0.103 | +     |
|                                                                               | Bright green              | 0.631 | 0.872 | 0.892 | 1.455 | 0.933 | 526   | 0.165 | -     |
|                                                                               | Grey blue                 | 1.550 | 2.311 | 2.592 | 2.001 | 2.476 | 485   | 0.094 | ~     |
|                                                                               | Bright blue               | 1.753 | 2.822 | 3.216 | 2.274 | 3.046 | 482   | 0.098 | +     |
|                                                                               | Olive green               | 0.475 | 0.556 | 0.527 | 1.223 | 0.587 | 544   | 0.255 | -     |
|                                                                               | Yellow green              | 0.393 | 0.420 | 0.352 | 1.465 | 0.450 | 549   | 0.390 | +     |
|                                                                               | Blue green                | 0.943 | 1.640 | 1.854 | 1.561 | 1.785 | 492   | 0.162 | +     |
|                                                                               | Bright green              | 0.571 | 0.931 | 0.997 | 1.327 | 1.011 | 512   | 0.197 | +     |
|                                                                               | Dark grey                 | 0.325 | 0.390 | 0.414 | 0.341 | 0.404 | 472   | 0.099 | -     |
|                                                                               | Bright grey               | 1.132 | 1.492 | 1.624 | 1.383 | 1.575 | 487   | 0.084 | +     |
|                                                                               | Bright blue               | 0.507 | 1.077 | 1.302 | 0.510 | 1.186 | 459   | 0.298 | +     |
|                                                                               | Dark blue                 | 0.375 | 0.639 | 0.767 | 0.211 | 0.691 | 439   | 0.513 | -     |
| <b>Dual-choice Experiment</b><br><b>Fig. 4</b><br>D65; AV400                  | Yellow 150                | 0.519 | 0.629 | 0.563 | 1.481 | 0.692 | 549   | 0.257 | +     |
|                                                                               | Yellow 200                | 0.557 | 0.873 | 0.792 | 2.562 | 1.023 | 542   | 0.266 | ++    |
|                                                                               | Yellow 230                | 0.592 | 1.102 | 1.017 | 3.497 | 1.328 | 534   | 0.260 | +++   |
|                                                                               | Yellow 245                | 0.637 | 1.297 | 1.219 | 4.197 | 1.583 | 529   | 0.253 | ++++  |
|                                                                               | Yellow 255                | 0.658 | 1.398 | 1.314 | 4.679 | 1.719 | 527   | 0.253 | +++++ |
|                                                                               | Low-saturated blue        | 6.409 | 5.596 | 5.639 | 2.272 | 5.294 | 415   | 0.126 | ++    |
|                                                                               | High-saturated blue       | 5.334 | 5.458 | 6.008 | 1.856 | 5.440 | 419   | 0.165 | +     |
| <b>Innate proboscis reflex</b><br><b>Fig. 5</b><br>Grey; Fl. tubes            | <i>Helianthus annuus</i>  | 0.171 | 0.225 | 0.193 | 1.086 | 0.261 | 545   | 0.571 | +     |
|                                                                               | <i>Taxus baccata</i>      | 0.367 | 0.953 | 1.072 | 1.545 | 1.078 | 506   | 0.377 | -     |
|                                                                               | <i>Corylus avellana</i>   | 0.181 | 0.535 | 0.553 | 1.463 | 0.618 | 514   | 0.523 | +     |
|                                                                               | <i>Juglans nigra</i>      | 0.202 | 0.619 | 0.662 | 1.444 | 0.711 | 512   | 0.507 | ~     |
|                                                                               | <i>Typha latifolia</i>    | 0.183 | 0.517 | 0.528 | 1.467 | 0.597 | 516   | 0.512 | +     |
|                                                                               | <i>Typha angustifolia</i> | 0.215 | 0.662 | 0.696 | 1.707 | 0.764 | 513   | 0.504 | +     |
|                                                                               | <i>N. pseudonarcissus</i> | 0.308 | 0.857 | 0.949 | 1.624 | 0.977 | 509   | 0.420 | -     |
|                                                                               | <i>Bellis perennis</i>    | 0.211 | 0.348 | 0.324 | 1.355 | 0.404 | 536   | 0.467 | +     |
|                                                                               | <i>Centaura jacea</i>     | 0.476 | 1.092 | 1.234 | 1.525 | 1.223 | 504   | 0.309 | -     |
|                                                                               | <i>Malva sylvestris</i>   | 0.266 | 0.611 | 0.686 | 0.884 | 0.683 | 506   | 0.378 | -     |
|                                                                               | <i>Papaver orientale</i>  | 0.142 | 0.214 | 0.238 | 0.186 | 0.228 | 485   | 0.234 | -     |
|                                                                               | Mixture 1                 | 0.242 | 0.688 | 0.741 | 1.539 | 0.787 | 512   | 0.465 | ~     |
|                                                                               | Mixture 2                 | 0.310 | 0.661 | 0.702 | 1.629 | 0.757 | 518   | 0.378 | ~     |
|                                                                               | Mixture 3                 | 0.254 | 0.472 | 0.479 | 1.426 | 0.542 | 527   | 0.397 | +     |
| Mixture 4                                                                     | 0.280                     | 0.581 | 0.625 | 1.275 | 0.660 | 517   | 0.375 | ~     |       |
| <b>Fig. 6</b><br>D65; AV400                                                   | $\beta$ -carotene UV+     | 3.068 | 1.869 | 1.243 | 2.705 | 1.537 | 578   | 0.184 | 17.27 |
|                                                                               | $\beta$ -carotene UV-     | 0.437 | 0.826 | 0.836 | 2.476 | 1.002 | 531   | 0.308 | 15.57 |

Table S2. Complete dataset. Excel worksheets presenting the calculations of the colour loci of the stimuli presented in the results; the worksheet tabs refer to the numbers of the figures in the results section. Excel worksheets are using the spectral reflectance of the colour stimuli and backgrounds and the spectral distribution of the ambient light (referred to as illumination) conditions in 1 nm steps as well as the adapted spectral sensitivity curves of the photoreceptor types of *Eristalis tenax*. The calculations of the spectral locus is done with the normalized spectral sensitivity curves in two steps as follows: `monoch.lim1` shows the calculation of the spectral locus from 350nm to 550nm and mixed purple monochromatic stimuli; `monoch.lim2` shows the calculation of the purple part of the spectral locus using mixtures of two monochromatic stimuli, which are 350 nm and 550nm. For all calculations it is assumed that the photoreceptors are half-maximally sensitive when stimulated by the background colour. In separate sheets the values for the spectral reflectance of all stimuli, the spectral sensitivity of all photoreceptors and the spectral distribution of illuminations and backgrounds are given. Not filled but yet numbered columns in the worksheets are formatted in order to calculate the colour loci of further stimuli. Note that the illumination and background must be customized for this purpose.

[Click here to Download Table S2](#)
